# Supplementary material for: Prediction of Refractive Error Based on Ultrawide Field Images With Deep Learning Models in Myopia Patients
Source: Front Med (Lausanne). 2022 Mar 30;9:834281. doi: 10.3389/fmed.2022.834281 (PMC9007166; doi:10.3389/fmed.2022.834281)
Supplement: Supplementary Table 1 — Patient characteristics of the training set, test set, whole data set and the external validation set. [file Table_1.DOCX]

|  | **Training Set** | **Test Set** | **Total** | **External Validation** | **P value** |
| --- | --- | --- | --- | --- | --- |
| No. | 790 | 197 | 987 | 133 |  |
| Age (year)† | 28.147.14 | 28.566.62 | 28.237.04 | 27.76.53 | 0.419 |
| Gender (Female/Male)§ | 559/231 | 154/43 | 713/274 | 110/23 | <0.01 |
| Spherical Equivalent (D)† | -11.464.61 | -10.023.34 | -11.174.41 | -9.032.79 | <0.01 |
| Axial Length (mm)† | 27.952.14 | 27.401.63 | 27.85±1.99 | 27.19 | <0.01 |
| Intraocular Pressure(mmHg) | 15.472.81 | 15.082.52 | 15.392.76 | NA |  |
| K1† | 42.801.50 | 42.951.52 | 42.831.51 | 42.701.19 | 0.189 |
| K2† | 44.431.65 | 44.501.72 | 44.441.66 | 44.151.35 | 0.147 |

Supplemental Table 1. The characteristic of the participants

† Kruskal-Wallis rank sum test, §chi-squared test
